# Supplementary material for: Effective Removal of Methylene Blue from Simulated Wastewater Using ZnO-Chitosan Nanocomposites: Optimization, Kinetics, and Isotherm Studies
Source: MDPI journal article supplement (doi:10.3390/molecules27154746), 2022-07-25
Supplement: s1 [file s1]

# Effective Removal of Methylene Blue from Simulated Wastewater Using ZnO-Chitosan Nanocomposites: Optimization, Kinetics, and Isotherm Studies

Zakariyya Uba Zango <sup>1,\*</sup>, John Ojur Dennis <sup>2</sup>, A.I. Aljameel <sup>3,\*</sup>, Fahad Usman <sup>4</sup>,  
Mohammed Khalil Mohammed Ali <sup>3</sup>, Bashir Abubakar Abdulkadir <sup>2</sup>, Saja Algessair <sup>3</sup>,  
Osamah A. Aldaghri <sup>3</sup> and Khalid Hassan Ibnaouf <sup>3</sup>

<sup>1</sup> Department of Chemistry, Al-Qalam University Katsina, PMB 2137, Katsina, Nigeria

<sup>2</sup> Department of Fundamental and Applied Science, Universiti Teknologi PETRONAS, Seri Iskandar 32610, Perak, Malaysia; jdennis100@gmail.com (J.O.D.); abubakar\_g03619@utp.edu.my (B.A.A.)

<sup>3</sup> Department of Physics, College of Science, Imam Mohammad Ibn Saud Islamic University (IMSIU), Riyadh 13318, Saudi Arabia; mkali@imamu.edu.sa (M.K.M.A.); saja.algessairs@imamu.edu.sa (S.A.); odaghri@imamu.edu.sa (O.A.); khiaimed@imamu.edu.sa (K.H.I.)

<sup>4</sup> Department of Physics, Al-Qalam University Katsina, PMB 2137, Katsina, Nigeria; fahadusman@auk.edu.ng (F.U.)

\* Correspondence: zakariyyazang@auk.edu.ng (Z.U.Z.); aialjameel@imamu.edu.sa (A.I.A.)

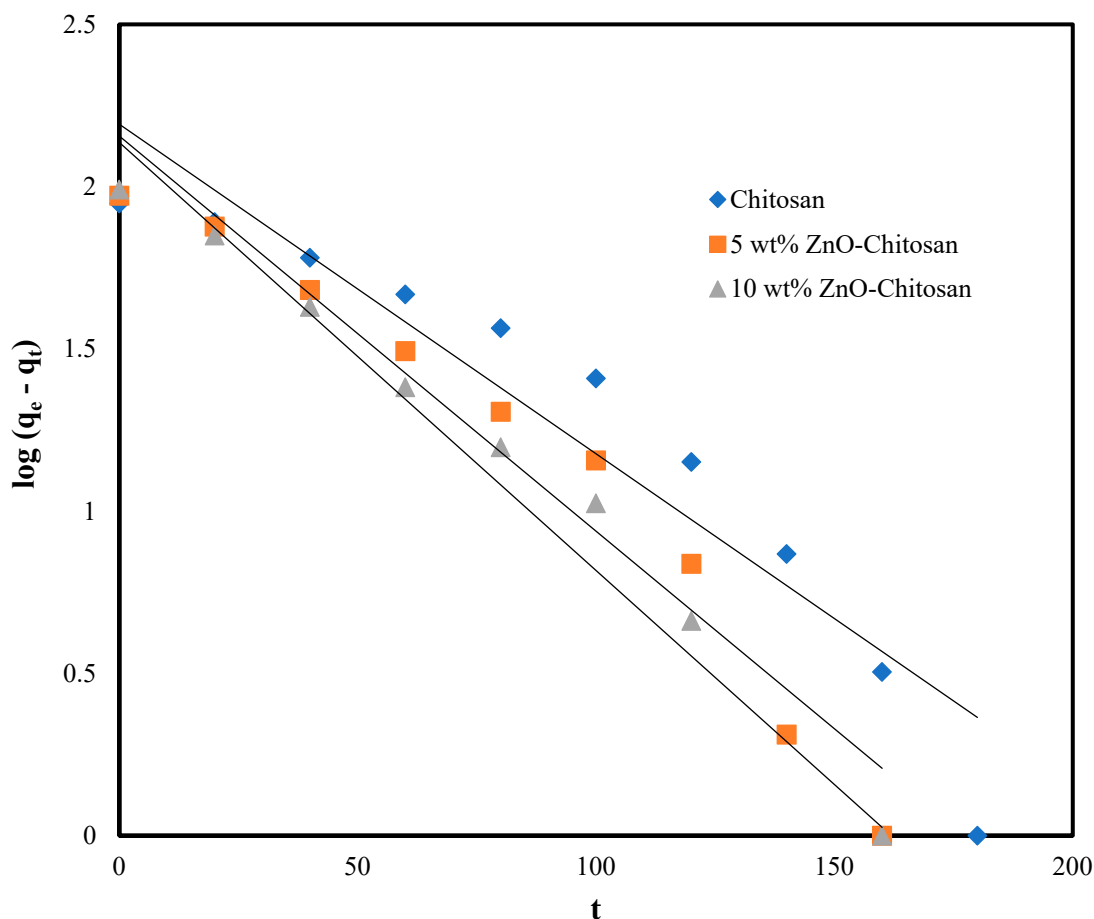

**Figure S1.** Pseudo-first order model plot for methylene blue adsorption onto chitosan and the nanocomposites.

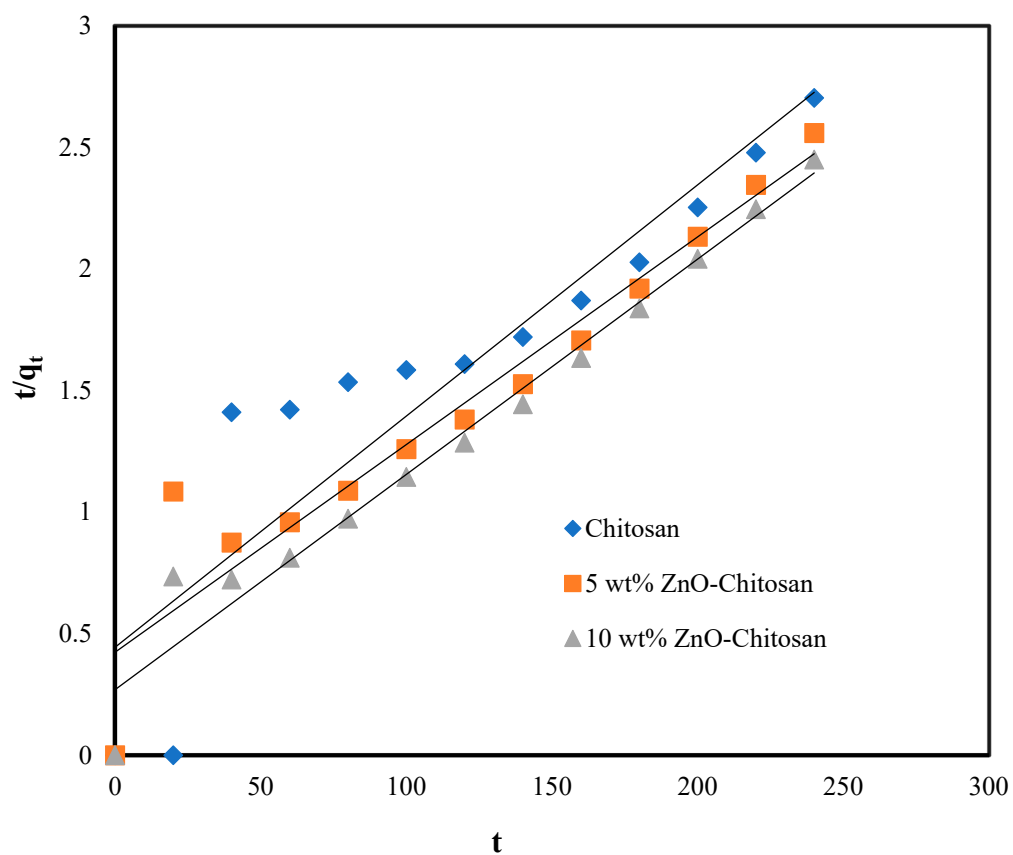

**Figure S2.** Pseudo-second order model plot for methylene blue adsorption onto chitosan and the nanocomposites.

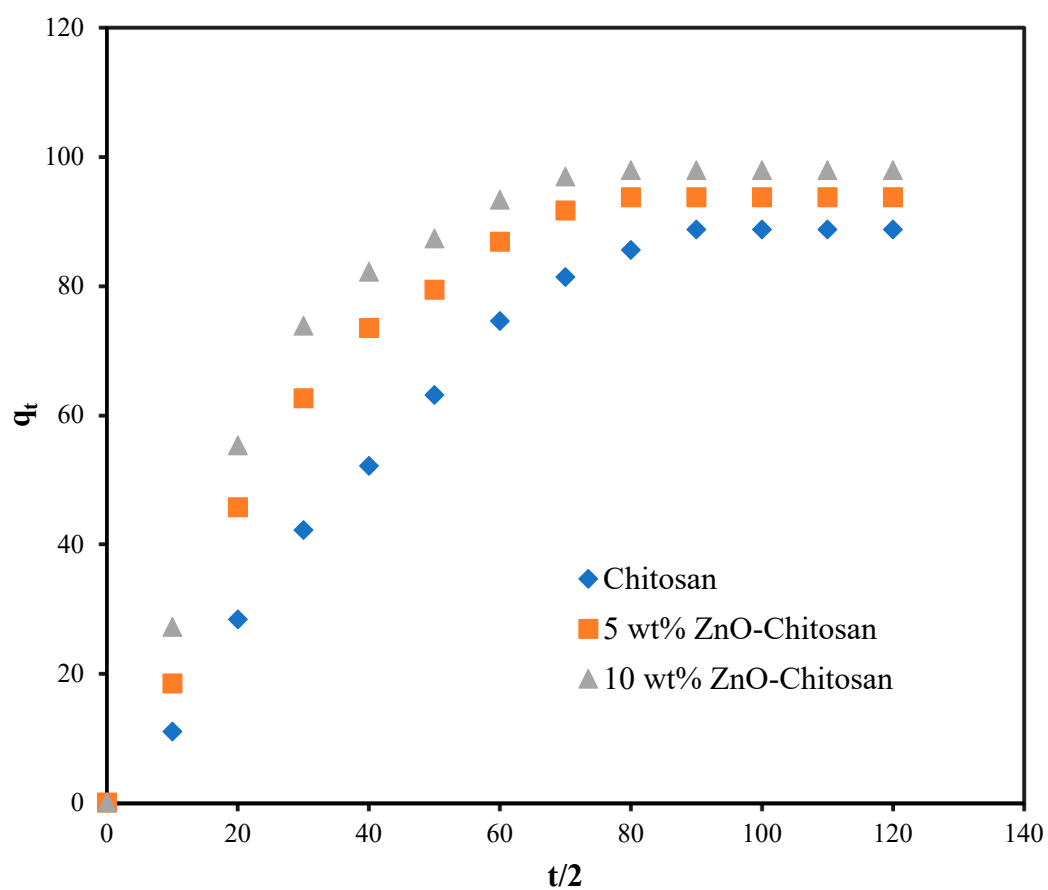

**Figure S3.** Intraparticle adsorption model plot for methylene blue adsorption onto chitosan and the nanocomposites.

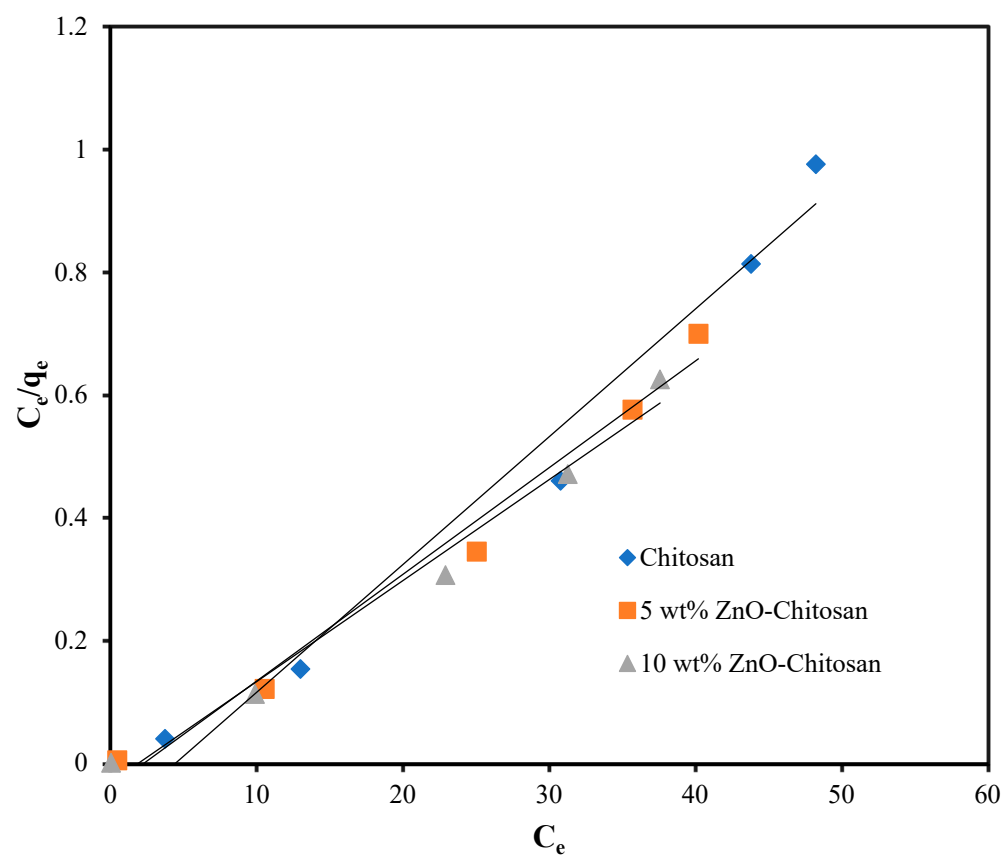

**Figure S4.** Langmuir isotherm model plot for methylene blue adsorption onto chitosan and the nanocomposites.

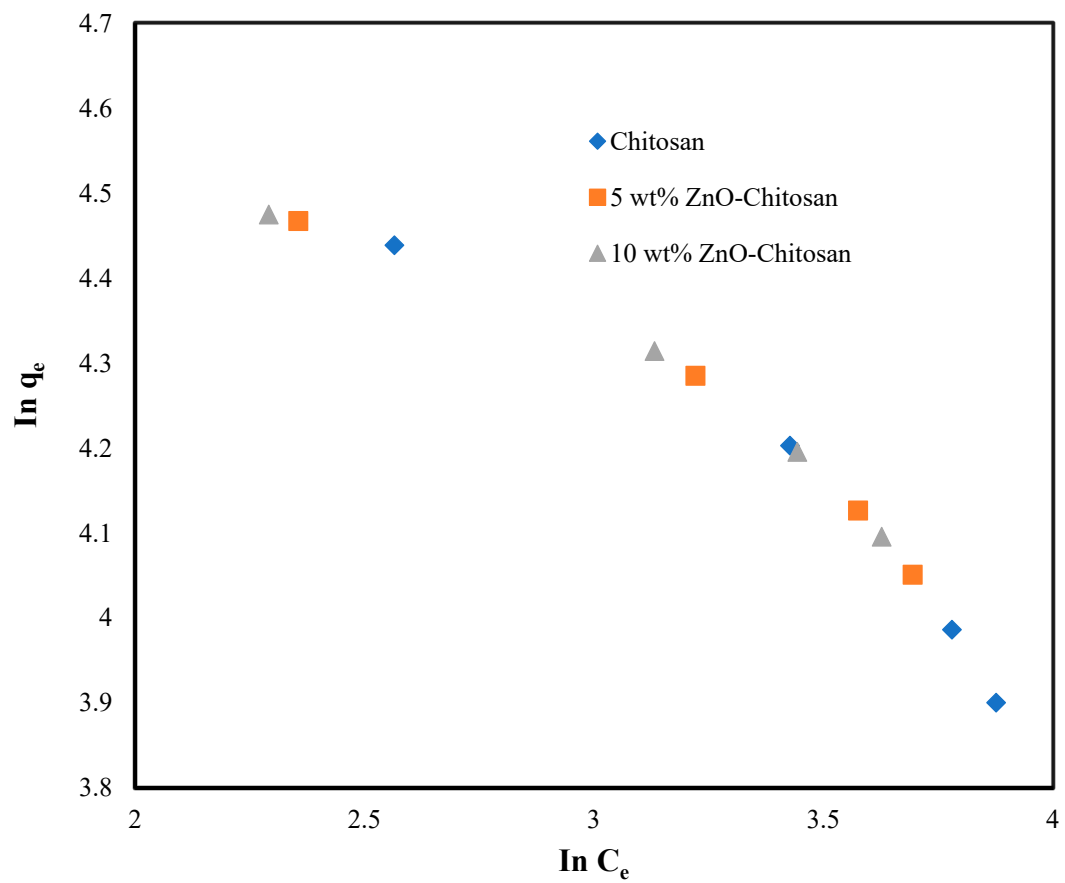

**Figure S5.** Freundlich isotherm model plot for methylene blue adsorption onto chitosan and the nanocomposites.

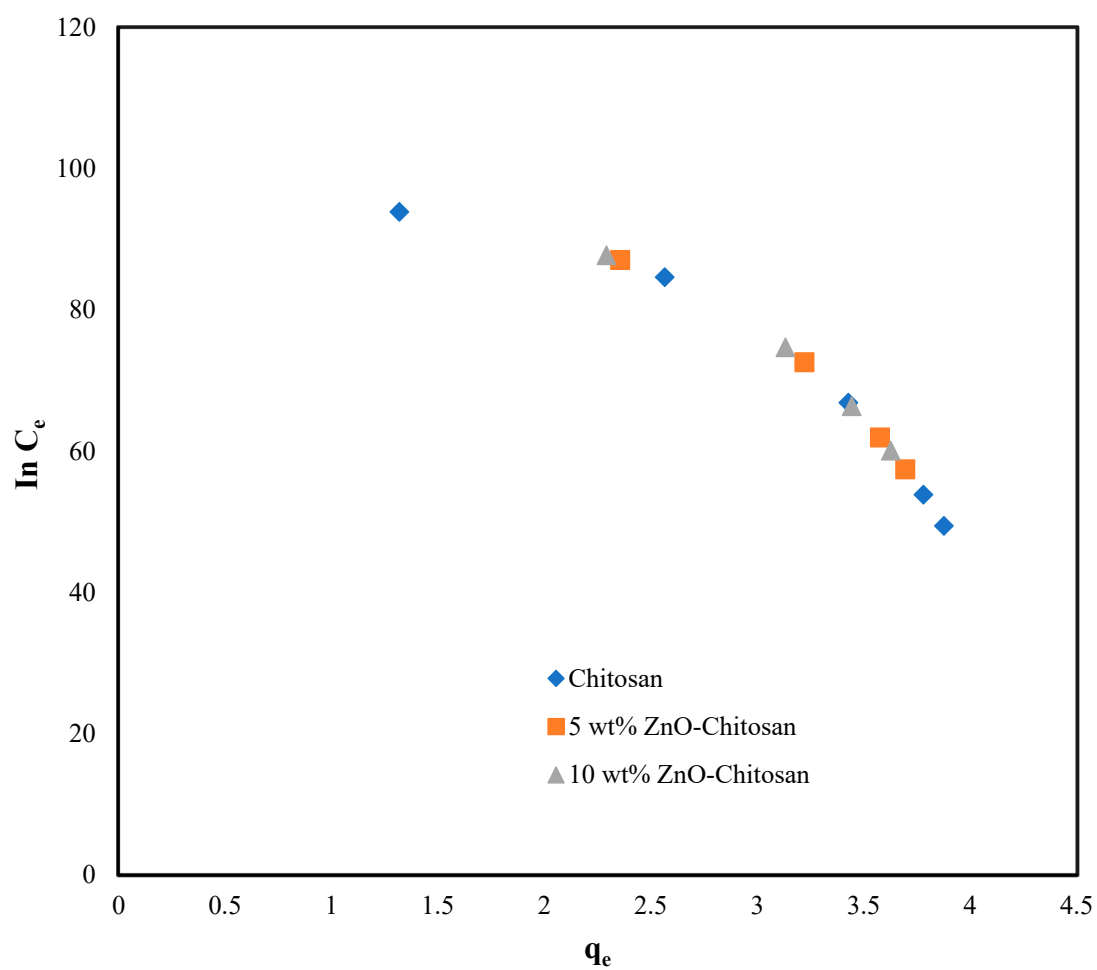

**Figure S6.** Temkin isotherm model plot for methylene blue adsorption onto chitosan and the nanocomposites.
